# Supplementary material for: PcNRAMP1 Enhances Cadmium Uptake and Accumulation in Populus × canescens
Source: MDPI journal article supplement (doi:10.3390/ijms23147593), 2022-07-08
Supplement: s1 [file s1]

**Table S1.** Primer sequences used in this study

| Name                            | Forward (5'- 3')                     | Reverse (5'- 3')                     | Applications |
|---------------------------------|--------------------------------------|--------------------------------------|--------------|
| <i>PcNRAMP1</i>                 | TGAAAATCCGCAAATCGC                   | TCCACAAAGATGTTCCGGTCAT               | RT-qPCR      |
| <i>PcNRAMP2</i>                 | AGGATTATTCCGATGAAGTAGC               | GTTGCCCACAGTAAGAGCC                  |              |
| <i>PcNRAMP3.1</i>               | CTCCTGGTGCTGTCAATCTAA                | GGCACGCCTGGAAAGAT                    |              |
| <i>PcNRAMP3.2</i>               | AGCTTTTCAAACATAACGGGAG               | TCTGATGTCATCGCTTAGCAA                |              |
| <i>PcNRAMP4</i>                 | TGGGAATTATTGGCATCAACA                | TCTGAACACCCCTCTATTATGGC              |              |
| <i>PcNRAMP5</i>                 | GCCCACTTGTCGCTTTACT                  | GTGGATTGACAACCCGAAG                  |              |
| <i>PcNRAMP6.1</i>               | ATGGCAATCTATATCCTAGCAG               | CAAGTCCGTTTTCCATGTTA                 |              |
| <i>PcNRAMP6.2</i>               | CACCACTATCAAATCGAGGTT                | TTTTCAAGGCAATAGCAAT                  |              |
| <i>PcActin2/7</i>               | CCCATTGAGCACGGTATTGT                 | TACGACCACTGGCATAACAGG                |              |
| <i>PcEF1<math>\alpha</math></i> | TCCCTTTGTCCCAATCTCTG                 | ACATCCTGAAGTGGGAGACG                 |              |
| <i>PcNRAMP1</i>                 | ATGGCGGGTTCGTCTTCTGT                 | CAAATCATTTGCATTACTCCTC               | Clone        |
| <i>GW-PcNRAMP1</i>              | GGGGACAAGTTTGTACAAAAAAGCAGGCTTAATGGC | GGGGACCACTTTGTACAAGAAAGCTGGGTCTTACAA | Gateway      |
|                                 | GGGTTCGTCTTCTGT                      | ATCATTTGCATTACTC                     |              |

Table S1. Continued

| Name                             | Forward (5'- 3')                     | Reverse (5'- 3')                     | Applications                      |
|----------------------------------|--------------------------------------|--------------------------------------|-----------------------------------|
| <i>35S-PcNRAMP1</i>              | TCCATTGCCCAGCTATCTGTCAC              | ACTCATACTTGTATTGCGCTCCT              |                                   |
| <i>PcNRAMP1</i> -RT              | GCACCATTGATTGAGAATTCAGA              | TCATACTTGTATTGCGCTCCT                | The selection of transgenic lines |
| <i>PcActin</i>                   | TCATCGGAATGGAAGCTGCTGGTA             | TCATCGGAATGGAAGCTGCTGGTA             |                                   |
| <i>PcNRAMP1</i> <sup>D61A</sup>  | TTGTTTCAATTGCATACATTGCCCCTGG         | GCAATGTATGCAATTGAAACAAGGAACCCGGGA    |                                   |
| <i>PcNRAMP1</i> <sup>G63A</sup>  | GCATACATTGACCCTGCAAATTTTGAAACTGACCT  | GCAGGGTCAATGTATGCAATTGAAACAAGGA      |                                   |
|                                  | GC                                   |                                      | Site-directed mutations           |
| <i>PcNRAMP1</i> <sup>M236A</sup> | CACTTCTCGGTGCCATGGTTGCGCCGCACAATCTC  | GAATGGAGATTGTGCGGCGCAACCATGGCACCGAGA |                                   |
|                                  | CATTC                                | AGTG                                 |                                   |
| <i>PcNRAMP1</i> <sup>P405A</sup> | CGATGATTCTATCTTTTGAGCTCGCTTTTGCTCTCG | CGAGCTCAAAAAGATAGAATCATCGATGCAATAATG |                                   |

**Table S2.** Accession numbers of *NRAMP* genes presented in Figure. 1.

| Gene Name         | Locus names or Accession nos. or AGI codes | Species                     |
|-------------------|--------------------------------------------|-----------------------------|
| <i>AtNRAMP1</i>   | AT1G80830                                  | <i>Arabidopsis thaliana</i> |
| <i>AtNRAMP2</i>   | AT1G47240                                  | <i>A. thaliana</i>          |
| <i>AtNRAMP3</i>   | AT2G23150                                  | <i>A. thaliana</i>          |
| <i>AtNRAMP4</i>   | AT5G67330                                  | <i>A. thaliana</i>          |
| <i>AtNRAMP5</i>   | AT4G18790                                  | <i>A. thaliana</i>          |
| <i>AtNRAMP6</i>   | AT1G15960                                  | <i>A. thaliana</i>          |
| <i>OsNRAMP1</i>   | Os07g0258400                               | <i>Oryza sativa</i>         |
| <i>OsNRAMP2</i>   | Os03g0208500                               | <i>O. sativa</i>            |
| <i>OsNRAMP3</i>   | Os06g0676000                               | <i>O. sativa</i>            |
| <i>OsNRAT1</i>    | Os02g0131800                               | <i>O. sativa</i>            |
| <i>OsNRAMP5</i>   | Os07g0257200                               | <i>O. sativa</i>            |
| <i>OsNRAMP6</i>   | Os01g0503400                               | <i>O. sativa</i>            |
| <i>OsNRAMP7</i>   | Os12g0581600                               | <i>O. sativa</i>            |
| <i>PcNRAMP1</i>   | Spta717-Potri.001G044900                   | <i>Populus × canescens</i>  |
| <i>PcNRAMP2</i>   | Spta717-Potri.002G121000                   | <i>P. × canescens</i>       |
| <i>PcNRAMP3.1</i> | Spta717-Potri.007G050600                   | <i>P. × canescens</i>       |
| <i>PcNRAMP3.2</i> | Spta717-Potri.007G050700                   | <i>P. × canescens</i>       |
| <i>PcNRAMP4</i>   | Spta717-Potri.002G080400                   | <i>P. × canescens</i>       |
| <i>PcNRAMP5</i>   | Spta717-Potri.002G080500                   | <i>P. × canescens</i>       |
| <i>PcNRAMP6.1</i> | Spta717-Potri.005G181000                   | <i>P. × canescens</i>       |
| <i>PcNRAMP6.2</i> | Spta717-Potri.005G181100                   | <i>P. × canescens</i>       |
| <i>PtNRAMP1</i>   | Potri.001G044900                           | <i>Populus trichocarpa</i>  |
| <i>PtNRAMP2</i>   | Potri.002G121000                           | <i>P. trichocarpa</i>       |
| <i>PtNRAMP3.1</i> | Potri.007G050600                           | <i>P. trichocarpa</i>       |
| <i>PtNRAMP3.2</i> | Potri.007G050700                           | <i>P. trichocarpa</i>       |

**Table S2.** Continued

| Gene Name         | Locus names or Accession nos. or AGI codes | Species               |
|-------------------|--------------------------------------------|-----------------------|
| <i>PtNRAMP4</i>   | Potri.002G080400                           | <i>P. trichocarpa</i> |
| <i>PtNRAMP5</i>   | Potri.002G080500                           | <i>P. trichocarpa</i> |
| <i>PtNRAMP6.1</i> | Potri.005G181000                           | <i>P. trichocarpa</i> |
| <i>PtNRAMP6.2</i> | Potri.005G181100                           | <i>P. trichocarpa</i> |

**Table S3.** Characteristics of the sequences of *PcNRAMP* genes and their proteins

| Gene name         | Accession number | Chromosomal location | Length of CDS (bp) | Number of amino acids (aa) | Molecular weight (KDa) | Theoretical pI | Grand average of hydropathicity | Transmembrane helices |
|-------------------|------------------|----------------------|--------------------|----------------------------|------------------------|----------------|---------------------------------|-----------------------|
| <i>PcNRAMP1</i>   | Potri.001G044900 | 1                    | 1626               | 541                        | 58.65                  | 8.6            | 0.571                           | 12                    |
| <i>PcNRAMP2</i>   | Potri.002G121000 | 2                    | 1611               | 536                        | 58.61                  | 5.19           | 0.496                           | 11                    |
| <i>PcNRAMP3.1</i> | Potri.007G050600 | 7                    | 1518               | 505                        | 55.51                  | 5.01           | 0.65                            | 11                    |
| <i>PcNRAMP3.2</i> | Potri.007G050700 | 7                    | 1503               | 500                        | 54.64                  | 4.93           | 0.667                           | 11                    |
| <i>PcNRAMP4</i>   | Potri.002G080400 | 2                    | 1659               | 552                        | 60.1                   | 8.23           | 0.442                           | 12                    |
| <i>PcNRAMP5</i>   | Potri.002G080500 | 2                    | 1641               | 546                        | 58.96                  | 7.06           | 0.548                           | 12                    |
| <i>PcNRAMP6.1</i> | Potri.005G181000 | 5                    | 1746               | 581                        | 63.4                   | 7.56           | 0.512                           | 12                    |
| <i>PcNRAMP6.2</i> | Potri.005G181100 | 5                    | 1758               | 585                        | 63.95                  | 8.42           | 0.463                           | 10                    |

**Table S4.** Biomass of WT and transgenic lines (*PcNRAMP1*-OE5, *PcNRAMP1*-OE8, *PcNRAMP1*-OE9) of *P. × canescens* treated with either 0 (–Cd) or 100 (+Cd)  $\mu$ M CdCl<sub>2</sub> for 2 weeks. Data indicate means  $\pm$  SE (n = 4). Different letters after the values indicate significant differences between the treatments. *P*-values of the two-way ANOVAs of genotype (G), Cd and their interactions (G  $\times$  Cd ) are also indicated. \*: *P*<0.05; \*\*: *P*<0.01; \*\*\*: *P*<0.001; \*\*\*\*: *P*<0.0001; ns: not significant.

| Genotype             | Cd<br>( $\mu$ M) | Root               | Wood               | Bark              | Leaf              | Whole plant        |
|----------------------|------------------|--------------------|--------------------|-------------------|-------------------|--------------------|
| WT                   | 0                | 0.64 $\pm$ 0.08 b  | 1.83 $\pm$ 0.48 c  | 1.38 $\pm$ 0.10 a | 7.50 $\pm$ 0.29 a | 11.34 $\pm$ 0.73 a |
|                      | 100              | 0.31 $\pm$ 0.01a   | 1.00 $\pm$ 0.13 ab | 0.72 $\pm$ 0.01 b | 5.62 $\pm$ 0.27 b | 7.69 $\pm$ 0.34 b  |
| <i>PcNRAMP1</i> -OE5 | 0                | 0.58 $\pm$ 0.17 ab | 1.97 $\pm$ 0.48 c  | 1.34 $\pm$ 0.12 a | 7.58 $\pm$ 1.2 a  | 11.47 $\pm$ 1.74 a |
|                      | 100              | 0.37 $\pm$ 0.02 ab | 0.84 $\pm$ 0.04 a  | 0.73 $\pm$ 0.07 b | 5.42 $\pm$ 0.16 b | 7.34 $\pm$ 0.06 b  |
| <i>PcNRAMP1</i> -OE8 | 0                | 0.53 $\pm$ 0.03 ab | 1.71 $\pm$ 0.06 bc | 1.50 $\pm$ 0.20 a | 7.31 $\pm$ 0.62 a | 11.05 $\pm$ 0.51 a |
|                      | 100              | 0.33 $\pm$ 0.03 a  | 0.95 $\pm$ 0.05 ab | 0.61 $\pm$ 0.04 b | 5.26 $\pm$ 0.26 b | 7.15 $\pm$ 0.21 b  |
| <i>PcNRAMP1</i> -OE9 | 0                | 0.60 $\pm$ 0.14 b  | 2.26 $\pm$ 0.22 c  | 1.40 $\pm$ 0.48 a | 7.42 $\pm$ 0.23 a | 11.80 $\pm$ 0.66 a |
|                      | 100              | 0.33 $\pm$ 0.02 a  | 0.77 $\pm$ 0.08 a  | 0.66 $\pm$ 0.06 b | 5.33 $\pm$ 0.28 b | 7.08 $\pm$ 0.40 b  |
| <i>P</i> -values     | G                | ns                 | ns                 | ns                | ns                | ns                 |
|                      | Cd               | **                 | ****               | ****              | ****              | ****               |
|                      | G x Cd           | ns                 | ns                 | ns                | ns                | ns                 |

**Table S5.** Concentrations of Mn, Fe, Zn, Ca and Mg in different tissues of WT and transgenic lines (*PcNRAMP1*-OE5, *PcNRAMP1*-OE8, *PcNRAMP1*-OE9) of *P. × canescens* treated with either 0 (–Cd) or 100 (+Cd)  $\mu$ M CdCl<sub>2</sub> for 2 weeks. Data indicate means  $\pm$  SE (n = 4). Different letters after the values indicate significant differences between the treatments. *P*-values of the two-way ANOVAs of genotype (G), Cd and their interactions (G  $\times$  Cd) are also indicated. \*: *P*<0.05; \*\*: *P*<0.01; \*\*\*: *P*<0.001; \*\*\*\*: *P*<0.0001; ns: not significant.

| Genotype             | Cd            | Root                          |                               |                               |                         |                         | Wood                          |                               |                               |                         |                         |
|----------------------|---------------|-------------------------------|-------------------------------|-------------------------------|-------------------------|-------------------------|-------------------------------|-------------------------------|-------------------------------|-------------------------|-------------------------|
|                      |               | Mn                            | Fe                            | Zn                            | Ca                      | Mg                      | Mn                            | Fe                            | Zn                            | Ca                      | Mg                      |
|                      |               | ( $\mu$ g g <sup>-1</sup> DW) | ( $\mu$ g g <sup>-1</sup> DW) | ( $\mu$ g g <sup>-1</sup> DW) | (mg g <sup>-1</sup> DW) | (mg g <sup>-1</sup> DW) | ( $\mu$ g g <sup>-1</sup> DW) | ( $\mu$ g g <sup>-1</sup> DW) | ( $\mu$ g g <sup>-1</sup> DW) | (mg g <sup>-1</sup> DW) | (mg g <sup>-1</sup> DW) |
| WT                   | 0             | 14.11 $\pm$ 1.94 a            | 275.80 $\pm$ 48.88 a          | 30.87 $\pm$ 4.03 ab           | 1.75 $\pm$ 0.53 a       | 6.50 $\pm$ 0.28 c       | 2.18 $\pm$ 0.22 a             | 152.73 $\pm$ 17.52 a          | 12.60 $\pm$ 0.94 a            | 0.75 $\pm$ 0.01 ab      | 0.46 $\pm$ 0.06 a       |
|                      | 100           | 11.28 $\pm$ 4.09 a            | 570.98 $\pm$ 31.70 b          | 48.05 $\pm$ 5.02 cd           | 4.20 $\pm$ 0.14 c       | 1.03 $\pm$ 0.08 ab      | 0.46 $\pm$ 0.07 a             | 136.65 $\pm$ 3.52 a           | 13.69 $\pm$ 3.08 ab           | 0.65 $\pm$ 0.01 a       | 0.36 $\pm$ 0.06 a       |
| <i>PcNRAMP1</i> -OE5 | 0             | 156.19 $\pm$ 9.49 b           | 691.88 $\pm$ 117.55 b         | 40.63 $\pm$ 3.29 bc           | 1.62 $\pm$ 0.11 a       | 0.70 $\pm$ 0.05 a       | 47.62 $\pm$ 12.58 b           | 338.37 $\pm$ 18.50 b          | 18.42 $\pm$ 1.36 cd           | 0.97 $\pm$ 0.03 c       | 0.33 $\pm$ 0.03 a       |
|                      | 100           | 9.62 $\pm$ 0.89 ab            | 1041.06 $\pm$ 61.22 c         | 27.00 $\pm$ 2.98 a            | 3.09 $\pm$ 0.16 b       | 0.71 $\pm$ 0.01 a       | 1.92 $\pm$ 0.2 a              | 126.93 $\pm$ 9.01 a           | 14.36 $\pm$ 0.94 ab           | 0.87 $\pm$ 0.04 bc      | 0.42 $\pm$ 0.08 a       |
| <i>PcNRAMP1</i> -OE8 | 0             | 183.90 $\pm$ 8.66 bc          | 708.94 $\pm$ 33.50 b          | 48.62 $\pm$ 0.7 cd            | 1.62 $\pm$ 0.05 a       | 0.94 $\pm$ 0.03 ab      | 46.24 $\pm$ 0.99 b            | 298.96 $\pm$ 19.18 b          | 21.75 $\pm$ 0.50 de           | 1.16 $\pm$ 0.05 d       | 0.34 $\pm$ 0.03 a       |
|                      | 100           | 4.24 $\pm$ 1.19 a             | 927.35 $\pm$ 18.83 c          | 37.5 $\pm$ 0.47 ab            | 3.23 $\pm$ 0.16 b       | 0.73 $\pm$ 0.02 a       | 0.8 $\pm$ 0.14 a              | 124.11 $\pm$ 0.23 a           | 18.24 $\pm$ 0.78 bc           | 0.91 $\pm$ 0.01 c       | 0.44 $\pm$ 0.05 a       |
| <i>PcNRAMP1</i> -OE9 | 0             | 171.68 $\pm$ 7.65 c           | 713.26 $\pm$ 61.33 b          | 56.61 $\pm$ 2.18 d            | 1.62 $\pm$ 0.18 a       | 1.17 $\pm$ 0.01 b       | 58.01 $\pm$ 2.62 b            | 303.47 $\pm$ 8.10 b           | 24.95 $\pm$ 1.35 e            | 1.36 $\pm$ 0.12 e       | 0.35 $\pm$ 0.04 a       |
|                      | 100           | 9.80 $\pm$ 0.98 ab            | 1106.96 $\pm$ 71.60 c         | 47.99 $\pm$ 3.63 cd           | 3.37 $\pm$ 0.18 b       | 0.74 $\pm$ 0.04 a       | 1.16 $\pm$ 0.4 a              | 124.89 $\pm$ 1.97 a           | 19.88 $\pm$ 0.61 d            | 0.96 $\pm$ 0.03 c       | 0.47 $\pm$ 0.02 a       |
| <i>P</i> -values     | G             | ****                          | ****                          | **                            | *                       | **                      | ****                          | ****                          | ****                          | ****                    | ns                      |
|                      | Cd            | ****                          | ****                          | ns                            | ****                    | ***                     | ****                          | ****                          | *                             | ****                    | ns                      |
|                      | G $\times$ Cd | ****                          | ns                            | **                            | ns                      | **                      | ****                          | ****                          | ns                            | *                       | ns                      |

**Table S5.** Continued

| Genotype             | Cd                | Bark                       |                            |                            |                          |                          | Leaf                       |                            |                            |                          |                          |
|----------------------|-------------------|----------------------------|----------------------------|----------------------------|--------------------------|--------------------------|----------------------------|----------------------------|----------------------------|--------------------------|--------------------------|
|                      |                   | Mn                         | Fe                         | Zn                         | Ca                       | Mg                       | Mn                         | Fe                         | Zn                         | Ca                       | Mg                       |
|                      | ( $\mu\text{M}$ ) | ( $\mu\text{g g}^{-1}$ DW) | ( $\mu\text{g g}^{-1}$ DW) | ( $\mu\text{g g}^{-1}$ DW) | ( $\text{mg g}^{-1}$ DW) | ( $\text{mg g}^{-1}$ DW) | ( $\mu\text{g g}^{-1}$ DW) | ( $\mu\text{g g}^{-1}$ DW) | ( $\mu\text{g g}^{-1}$ DW) | ( $\text{mg g}^{-1}$ DW) | ( $\text{mg g}^{-1}$ DW) |
| WT                   | 0                 | 13.8 $\pm$ 1.56 a          | 140.21 $\pm$ 9.05 a        | 136.48 $\pm$ 16.39 a       | 12.85 $\pm$ 1.57 b       | 2.73 $\pm$ 0.55 b        | 28.21 $\pm$ 1.77 b         | 240.54 $\pm$ 3.77 bc       | 53.24 $\pm$ 1.20 ab        | 7.04 $\pm$ 0.96 d        | 3.48 $\pm$ 0.43 d        |
|                      | 100               | 3.75 $\pm$ 0.15 a          | 108.72 $\pm$ 7.92 a        | 114.49 $\pm$ 11.36 a       | 6.82 $\pm$ 0.169 a       | 2.37 $\pm$ 0.52 ab       | 7.97 $\pm$ 0.91 a          | 228.60 $\pm$ 9.76 b        | 37.49 $\pm$ 2.58 a         | 2.60 $\pm$ 0.04 a        | 1.42 $\pm$ 0.26 ab       |
| <i>PcNRAMP1</i> -OE5 | 0                 | 332.66 $\pm$ 36.57 b       | 775.91 $\pm$ 31.92 b       | 155.03 $\pm$ 11.01 ab      | 11.84 $\pm$ 0.92 b       | 1.78 $\pm$ 0.03 ab       | 51.91 $\pm$ 12.71 c        | 283.50 $\pm$ 24.19 cd      | 71.94 $\pm$ 9.51 cd        | 7.91 $\pm$ 0.74 d        | 2.25 $\pm$ 0.35 c        |
|                      | 100               | 16.58 $\pm$ 1.71 a         | 155.24 $\pm$ 0.09 a        | 121.34 $\pm$ 16.22 a       | 7.75 $\pm$ 0.34 a        | 1.51 $\pm$ 0.16 a        | 21.15 $\pm$ 1.57 ab        | 171.94 $\pm$ 20.98 a       | 40.74 $\pm$ 4.42 a         | 3.56 $\pm$ 0.07 ab       | 1.26 $\pm$ 0.01 a        |
| <i>PcNRAMP1</i> -OE8 | 0                 | 337.68 $\pm$ 6.96 b        | 778.16 $\pm$ 43.45 b       | 193.79 $\pm$ 7.05 bc       | 11.87 $\pm$ 0.48 b       | 1.75 $\pm$ 0.04 ab       | 54.03 $\pm$ 7.15 c         | 298.65 $\pm$ 4.06 d        | 82.7 $\pm$ 4.02 de         | 7.38 $\pm$ 0.65 d        | 2.13 $\pm$ 0.24 bc       |
|                      | 100               | 7.94 $\pm$ 1.94 a          | 145.22 $\pm$ 5.73 a        | 120.39 $\pm$ 10.85 a       | 7.93 $\pm$ 0.06 a        | 1.46 $\pm$ 0.13 a        | 12.35 $\pm$ 1.27 a         | 171.62 $\pm$ 13.36 a       | 66.7 $\pm$ 2.23 bc         | 4.22 $\pm$ 0.19 ab       | 1.27 $\pm$ 0.02 a        |
| <i>PcNRAMP1</i> -OE9 | 0                 | 359.33 $\pm$ 20.97 b       | 715.89 $\pm$ 19.65 b       | 226.96 $\pm$ 11.50 c       | 11.90 $\pm$ 0.15 b       | 1.72 $\pm$ 0.05 ab       | 51.38 $\pm$ 5.22 c         | 308.29 $\pm$ 18.45 d       | 93.45 $\pm$ 6.70 e         | 6.86 $\pm$ 1.32 cd       | 2.01 $\pm$ 0.20 b        |
|                      | 100               | 9.35 $\pm$ 0.45 a          | 150.20 $\pm$ 9.51 a        | 119.45 $\pm$ 6.72 a        | 8.45 $\pm$ 0.30 a        | 1.41 $\pm$ 0.15 a        | 14.31 $\pm$ 0.57 ab        | 180.62 $\pm$ 21.12 a       | 85.69 $\pm$ 8.68 de        | 4.88 $\pm$ 0.40 bc       | 1.28 $\pm$ 0.06 a        |
| <i>P</i> -values     | G                 | ****                       | ****                       | **                         | ns                       | *                        | *                          | ns                         | ****                       | ns                       | *                        |
|                      | Cd                | ****                       | ****                       | ****                       | ****                     | ns                       | ****                       | ****                       | ***                        | ****                     | ****                     |
|                      | G $\times$ Cd     | ****                       | ****                       | **                         | ns                       | ns                       | ns                         | **                         | ns                         | ns                       | ns                       |



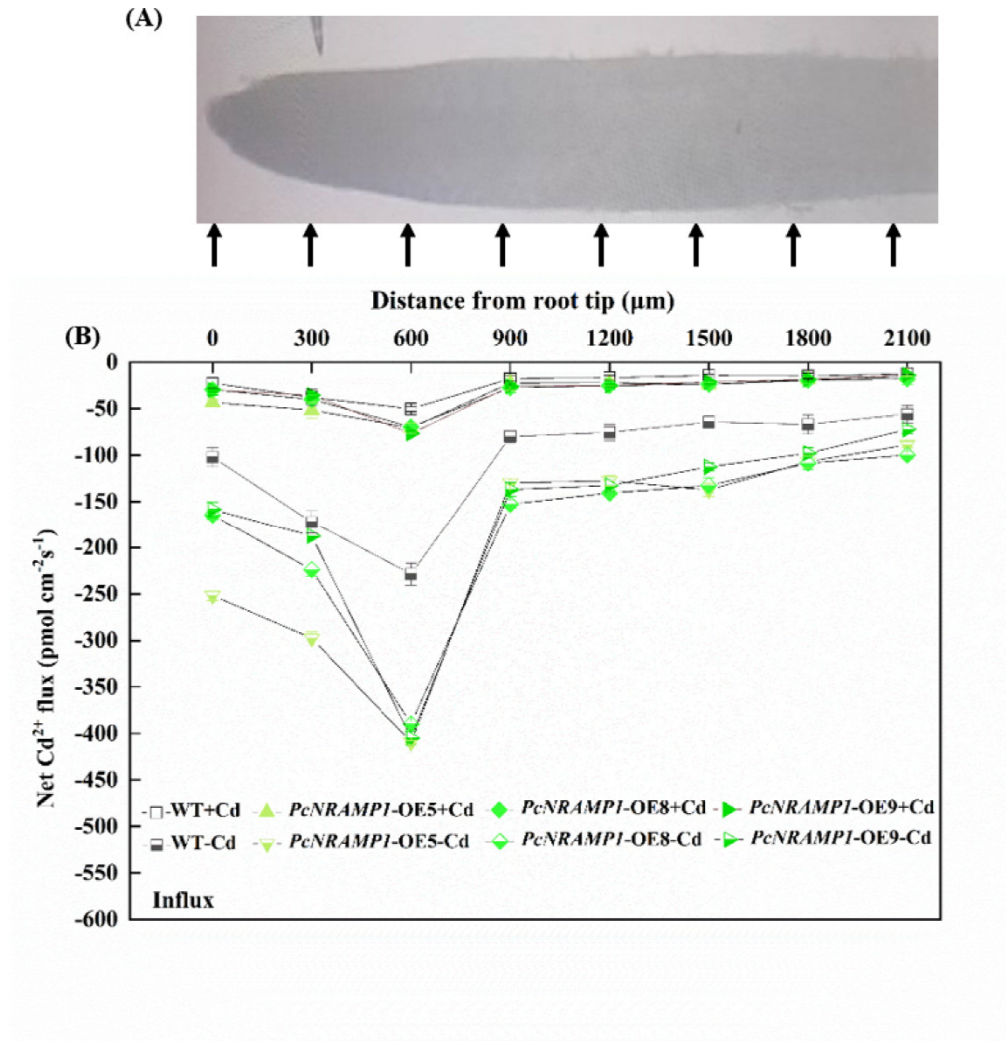

**Figure S1.** Root tip and net  $\text{Cd}^{2+}$  fluxes along root apices. (A-B) Root tip and net  $\text{Cd}^{2+}$  fluxes along root apices of WT and transgenic lines ( $PcNRAMP1\text{-OE5}$ ,  $PcNRAMP1\text{-OE8}$ ,  $PcNRAMP1\text{-OE9}$ ) of *P. × canescens* exposed to either 0 (–Cd) or 100 (+Cd)  $\mu\text{M}$   $\text{CdCl}_2$  for 2 weeks. Data indicate means  $\pm$  SE ( $n = 4$ ).

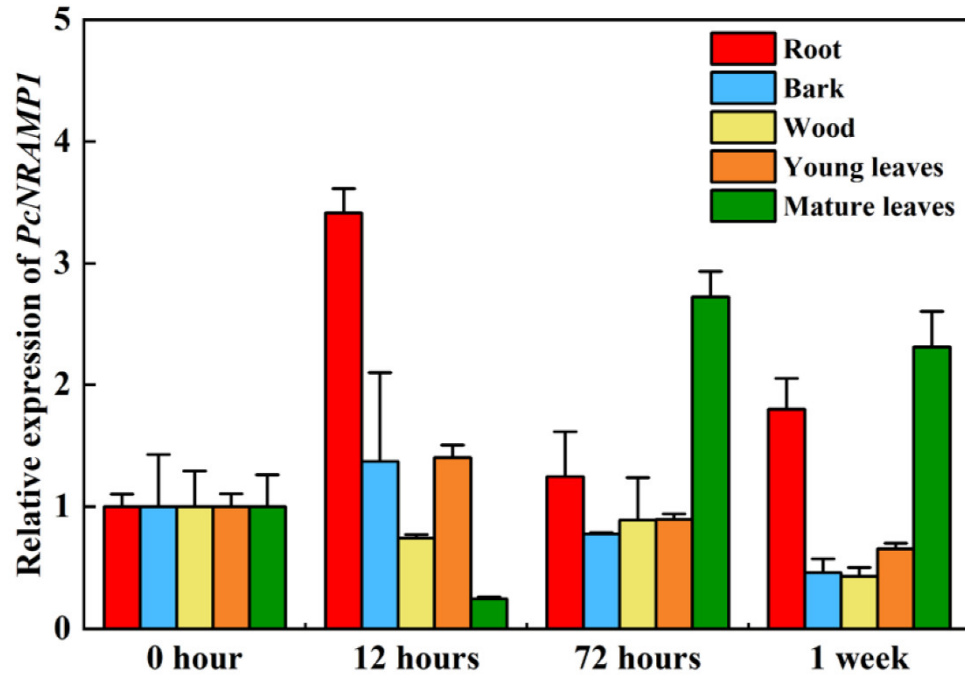

**Figure S2.** The expression levels of *PcNRAMP1* in different tissues of *P. × canescens* exposed to Cd for different times. Bars indicate means  $\pm$  SE (n = 4). The expression level of *PcNRAMP1* was set to 1 in different tissues at the beginning of the treatment (0 hour), and the corresponding fold changes were calculated at the other time points.

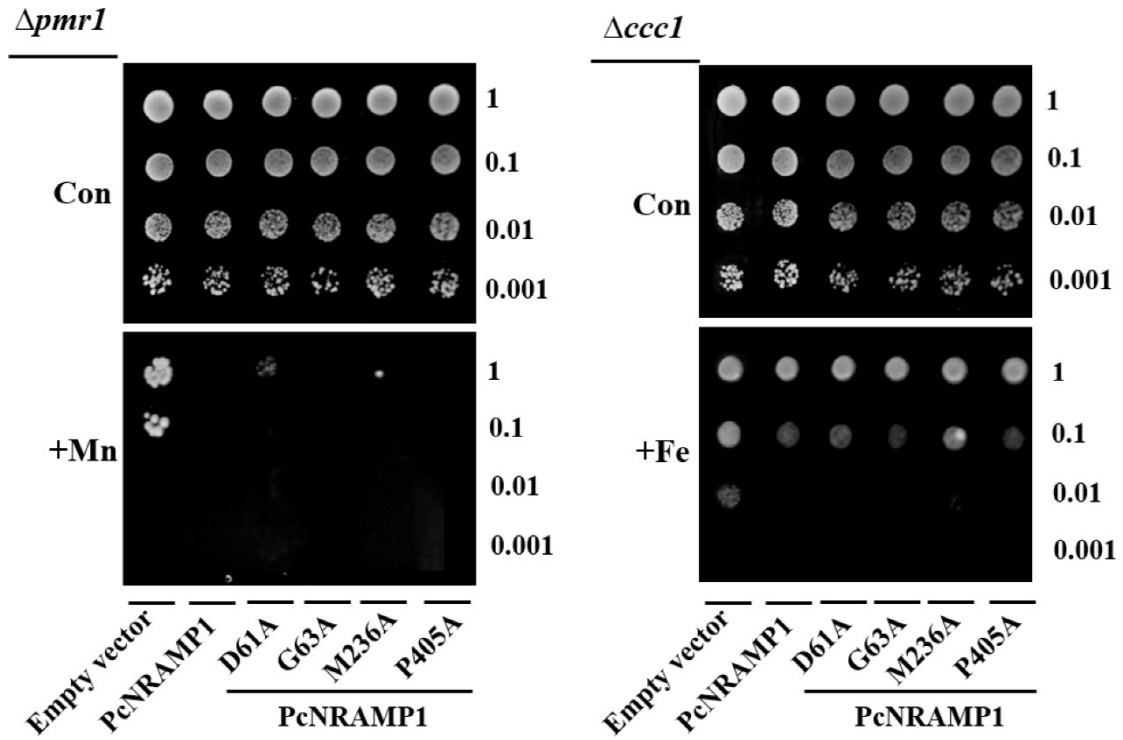

**Figure S3.** The growth status of yeast mutant strains  $\Delta pmr1$  and  $\Delta ccc1$  cells transformed with empty vector (pYES2), *PcNRAMP1*, or the mutated *PcNRAMP1*. The growth status of yeast mutant strains  $\Delta pmr1$  and  $\Delta ccc1$  hypersensitive to excess Mn and Fe, respectively, cells in which empty vector (pYES2), *PcNRAMP1*, or the mutated *PcNRAMP1* ( $PcNRAMP1^{D61A}$ ,  $PcNRAMP1^{G63A}$ ,  $PcNRAMP1^{M236A}$  and  $PcNRAMP1^{P405A}$ ) was transformed. The yeast cells diluted with OD600 nm of 1-0.001 were cultured in the plate with galactose under either control (Con) or other bivalent metals including 1 (+Mn) mM  $MnSO_4$  and 8 (+Fe) mM  $FeSO_4$  for 4 days.

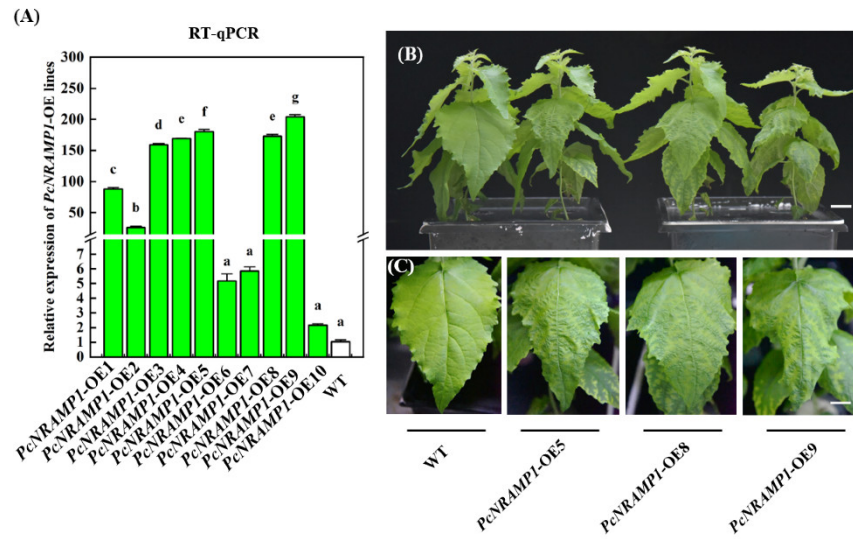

**Figure S4.** The selection of transgenic lines and the phenotypes of WT and poplars overexpressing *PcNRAMP1*. (A) The selection of transgenic lines. (B-C) The phenotypes of the aboveground plant and mature leaves (LPI=8) of WT and *PcNRAMP1*-overexpressed *P. × canescens* supplied with one-fourth Hoagland solution for 1 month. Scale bars in panels B and C indicate 5 and 2 cm, respectively.

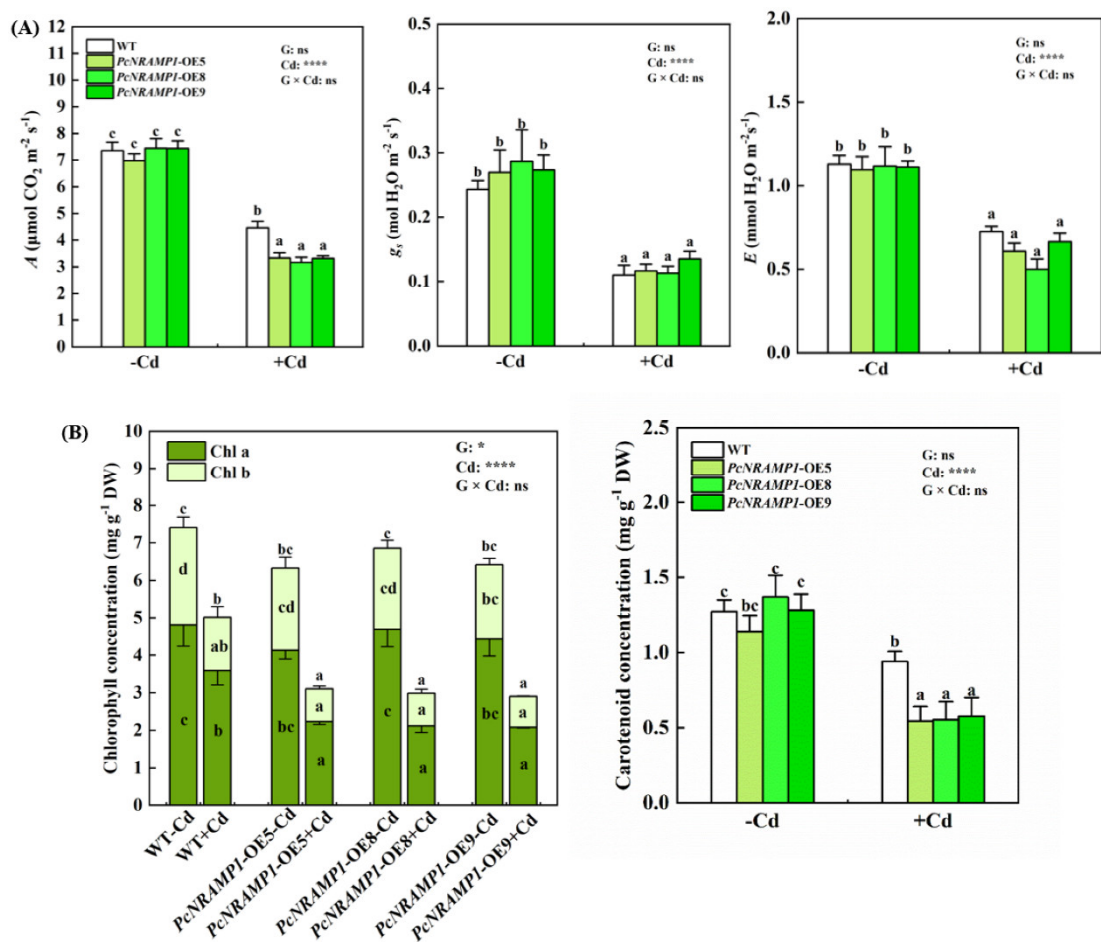

**Figure S5.** Photosynthesis and chlorophyll concentrations of WT and transgenic lines. (A-B) The photosynthetic characteristics and chlorophyll concentrations of WT and *PcNRAMP1*-OE5, *PcNRAMP1*-OE8, *PcNRAMP1*-OE9 of *P. × canescens* treated with either 0 (–Cd) or 100 (+Cd)  $\mu\text{M}$   $\text{CdCl}_2$  for 2 weeks. Data indicate means  $\pm$  SE ( $n = 4$ ). Different letters on the bars indicate significant differences between the treatments. *P*-values of the two-way ANOVAs of genotype (G), Cd and their interactions ( $G \times \text{Cd}$ ) are also indicated. \*:  $P < 0.05$ ; \*\*:  $P < 0.01$ ; \*\*\*:  $P < 0.001$ ; \*\*\*\*:  $P < 0.0001$ ; ns: not significant.
